# Supplementary material for: The catalytic performances and reaction mechanism of nanoparticle Cd/Ce–Ti oxide catalysts for NH3-SCR reaction
Source: Royal Society of Chemistry journal article supplement (doi:10.1039/c7ra06931f), 2017-01-01
Supplement: c7ra06931f1.pdf [file c7ra06931f1.pdf]

## Supplemental Information

### **The catalytic performances and reaction mechanism of nanoparticle Cd/Ce-Ti oxide catalysts for NH<sub>3</sub>-SCR reaction**

Zhichen Duan<sup>1</sup>, Kebin Chi<sup>2</sup>, Jian Liu<sup>1,\*</sup>, Juan Shi<sup>1</sup>, Zhen Zhao<sup>1</sup>, Yuechang Wei<sup>1</sup>, Weiyu Song<sup>1</sup>

1. State Key Laboratory of Heavy Oil Processing, Beijing Key Lab of Oil & Gas Pollution Control,  
China University of Petroleum, Beijing 102249, China

2. Petrochemical Research Institute, Petro China Company Limited, Beijing 100195, China

\* Corresponding author: Email address: liujian@cup.edu.cn

Postal Address: 18# Fuxue Road, Chang Ping District, Beijing, 102249, China,

Tel: 86-10-89732278, Fax: 86-10-69724721

Fourier transform infrared (FT-IR) absorbance spectra were recorded in the wave numbers ranging from 4000 to 400  $\text{cm}^{-1}$  via a FTS-3000 spectrophotometer. The measured wafer was prepared with the weight ratio of sample to KBr, 1/100. The resolution was set at 2  $\text{cm}^{-1}$  during measurements.

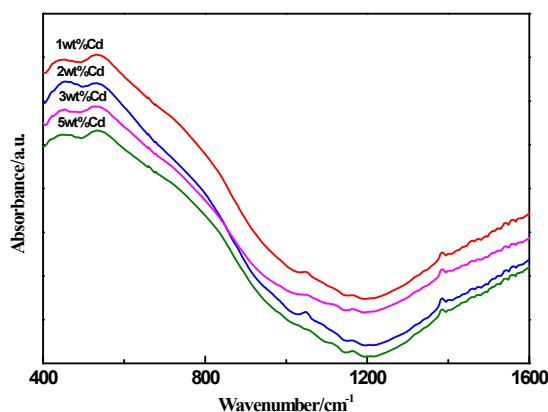

**Fig.1 FT-IR spectra of Cd<sub>M</sub>/Ce<sub>0.3</sub>TiO<sub>x</sub> catalysts**

FT-IR spectra of Cd<sub>M</sub>/Ce<sub>0.3</sub>TiO<sub>x</sub> samples are shown in Fig. 1. The spectra of all samples exhibit similar structure characteristics. There is obvious bands attributing to anatase TiO<sub>2</sub> (500-540  $\text{cm}^{-1}$ ). It may be assumed that the loading of the Cd rarely affect on the anatase TiO<sub>2</sub> structure of the supporter. The band at 450  $\text{cm}^{-1}$  expresses the vibration of TO<sub>4</sub> units, and that at 540  $\text{cm}^{-1}$  is attributed to the vibration of Ti-O bands while the band at 1386  $\text{cm}^{-1}$  attributes to the vibration of Ce-O bands. There are no obvious bands attributing to the vibration of Cd. It may be due to the low metal loadings and the band of the vibration of those loading metals overlapping with that of anatase TiO<sub>2</sub>.

Ce<sub>y</sub>TiO<sub>x</sub> (y=0.02, 0.1, 0.2, 0.3, 0.5) have being prepared in pervious study and the Ce<sub>0.3</sub>TiO<sub>x</sub> catalyst shows the best catalytic performance

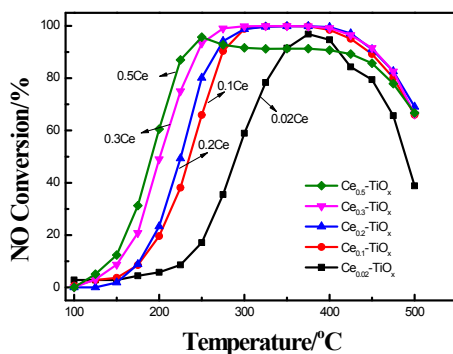

**Fig. 2 NO conversion as a function of reaction temperature over Ce<sub>y</sub>TiO<sub>x</sub> catalysts**
